# Supplementary material
Source: PubMed Central journal article supplement (PMC2707020)
Supplement: NIHMS108820-supplement-01.pdf [file NIHMS108820-supplement-01.pdf]

## **Supplementary appendix**

This appendix formed part of the original submission and has been peer reviewed. It is presented as supplied by the authors.

Supplement to: Den Boer ML, van Slegtenhorst M, De Menezes RX, et al. A subtype of childhood acute lymphoblastic leukaemia with poor treatment outcome: a genome-wide classification study. *Lancet Oncology* 2009; published online Jan 9.  
DOI:10.1016/S1470-2045(08)70339-5.

**Figure 1: FISH analysis of a dic(9;20)(p13;q11) chromosome**

A) The genomic position of BAC clones used for FISH analysis is depicted. (B) FISH analysis using RP11-397D12 (green) and RP5-836N17 (red) confirms a dic(9;20) in patient #2 (see also supplementary table 8).

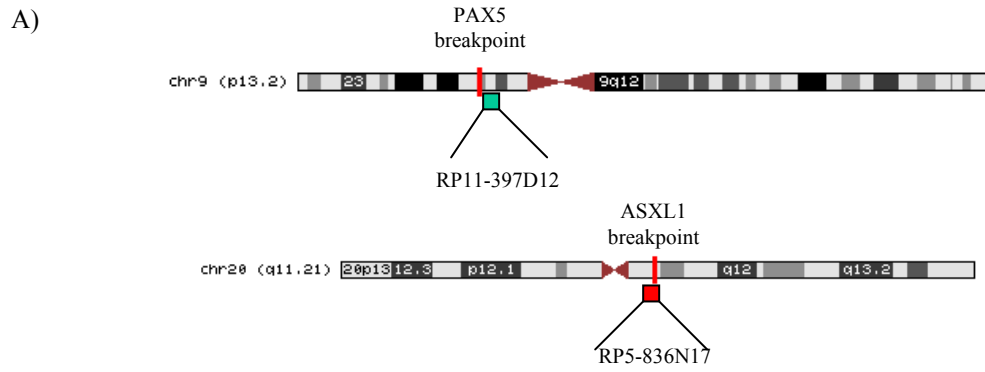

B)

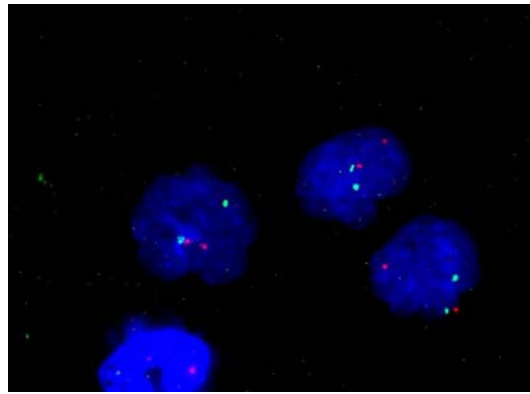

**Table 1: Representation of ALL subtypes in training/discovery (COALL) and validation (DCOG) cohort**

|                                        | COALL cohort           |     | DCOG cohort    |     | Literature** |
|----------------------------------------|------------------------|-----|----------------|-----|--------------|
|                                        | training/discovery set |     | validation set |     | %            |
|                                        | N                      | %   | N              | %   |              |
| <b>ALL subtype</b>                     |                        |     |                |     |              |
| T-lineage ALL                          | 36                     | 19  | 15             | 14  | 15           |
| Precursor B-ALL:                       |                        |     |                |     |              |
| <i>ETV6-RUNX1 (TEL-AML1)</i> -positive | 44                     | 23  | 24             | 22  | 20-25        |
| Hyperdiploid*                          | 44                     | 23  | 28             | 26  | 25           |
| <i>TCF3 (E2A)</i> -rearranged          | 13                     | 7   | 2              | 2   | 5            |
| <i>BCR-ABL1</i> -positive              | 5                      | 3   | 1              | 1   | <5           |
| <i>MLL</i> -rearranged                 | 4                      | 2   | 4              | 4   | <5           |
| B-other                                | 44                     | 23  | 33             | 31  | 25           |
| <b>Total</b>                           | 190                    | 100 | 107            | 100 | 100          |

\* Hyperdiploid: >50 chromosomes and/or DNA index  $\geq 1.16$

\*\* Pui CH et al., *New Engl J Med* 2004;**350**:1535-48; Pieters R and Carroll WL, *Pediatr Clin North Am* 2008;**55**:1-20.

**Table 2: Number of genes discriminative for 6 major subtypes of pediatric ALL at selected P-value cut-offs<sup>1</sup>**

| <b>ALL subtype</b>                     | <b>P&lt;10<sup>-8</sup><br/>#genes</b> | <b>P&lt;10<sup>-6</sup><br/>#genes</b> | <b>P&lt;10<sup>-4</sup><br/>#genes</b> | <b>P&lt;0.001<br/>#genes</b> | <b>P&lt;0.005<br/>#genes</b> | <b>P&lt;0.01<br/>#genes</b> | <b>P&lt;0.05<br/>#genes</b> |
|----------------------------------------|----------------------------------------|----------------------------------------|----------------------------------------|------------------------------|------------------------------|-----------------------------|-----------------------------|
| T-lineage                              | 988                                    | 1722                                   | 2871                                   | 3831                         | 4777                         | 5283                        | 7005                        |
| <i>ETV6-RUNX1</i> -positive            | 152                                    | 293                                    | 665                                    | 1077                         | 1581                         | 1905                        | 3116                        |
| Hyperdiploid                           | 87                                     | 242                                    | 668                                    | 1152                         | 1670                         | 2011                        | 3098                        |
| <i>TCF3 (E2A)</i> -rearranged          | 0                                      | 0                                      | 23                                     | 131                          | 332                          | 473                         | 1052                        |
| <i>BCR-ABL1</i> -positive <sup>2</sup> | 0                                      | 0                                      | 0                                      | 0                            | 0                            | 0                           | 0                           |
| <i>MLL</i> -rearranged <sup>2</sup>    | 0                                      | 0                                      | 0                                      | 0                            | 0                            | 0                           | 0                           |

<sup>1</sup> Wilcoxon P-value corrected for multiple testing (=false discovery rate)

<sup>2</sup> No significant probe sets were found for *BCR-ABL1*-positive and *MLL*-rearranged cases in the COALL training cohort. Instead of newly selected probe sets, we have used the top-50 of the previously compiled decision tree list reported by Ross ME *et al.* (*Blood* 2003;**102**:2951-9) in the double-loop cross validation procedure to construct our classifier.

**Table 3: Definition of diagnostic test values**

|                   |          | True subtype |          |
|-------------------|----------|--------------|----------|
|                   |          | positive     | negative |
| Predicted subtype | positive | a            | b        |
|                   | negative | c            | d        |

sensitivity  $a/(a+c)$   
specificity  $d/(b+d)$   
positive predictive value (PPV)  $a/(a+b)$   
negative predictive value (NPV)  $d/(c+d)$   
prediction accuracy  $(a+d)/(a+b+c+d)$

**Table 4: Overview of overlapping probe sets identified by 3 gene expression classification studies in pediatric ALL**

| Probe Set ID | Group                  | Ratio <sup>1</sup> | Yeoh <sup>2</sup> | Ross <sup>3</sup> | Gene Symbol    |
|--------------|------------------------|--------------------|-------------------|-------------------|----------------|
| 200600_at    | Hyperdiploid           | 2.21               |                   | *                 | MSN            |
| 200953_s_at  | TCF3(E2A)-rearranged   | 0.08               | *                 | *                 | CCND2          |
| 201132_at    | Hyperdiploid           | 2.12               | *                 | *                 | HNRPH2         |
| 201136_at    | Hyperdiploid           | 3.04               |                   | *                 | PLP2           |
| 201153_s_at  | MLL-rearranged         | 4.05               | *                 | *                 | MBNL1          |
| 201443_s_at  | Hyperdiploid           | 2.75               | *                 |                   | ATP6AP2        |
| 201579_at    | TCF3(E2A)-rearranged   | 21.50              | *                 | *                 | FAT            |
| 201811_x_at  | Hyperdiploid           | 9.65               | *                 |                   | SH3BP5         |
| 202086_at    | BCR-ABL1               | 0.35               | *                 |                   | MX1            |
| 202123_s_at  | BCR-ABL1               | 2.35               | *                 | *                 | ABL1           |
| 202478_at    | TCF3(E2A)-rearranged   | 20.84              | *                 |                   | TRIB2          |
| 202517_at    | ETV6-RUNX1             | 5.34               | *                 |                   | CRMP1          |
| 202838_at    | ETV6-RUNX1             | 2.89               | *                 |                   | FUCA1          |
| 203372_s_at  | TCF3(E2A)-rearranged   | 0.04               |                   | *                 | SOCS2          |
| 203373_at    | TCF3(E2A)-rearranged   | 0.03               | *                 | *                 | SOCS2          |
| 203434_s_at  | MLL-rearranged         | 0.05               |                   | *                 | MME            |
| 203611_at    | T-ALL                  | 0.15               | *                 |                   | TERF2          |
| 203865_s_at  | TCF3(E2A)-rearranged   | 27.45              | *                 |                   | ADARB1         |
| 204069_at    | MLL-rearranged         | 79.80              | *                 | *                 | MEIS1          |
| 204446_s_at  | MLL-rearranged         | 0.02               |                   | *                 | ALOX5          |
| 204674_at    | TCF3(E2A)-rearranged   | 6.88               | *                 | *                 | LRMP           |
| 204849_at    | ETV6-RUNX1             | 11.09              | *                 | *                 | TCFL5          |
| 204890_s_at  | T-ALL                  | 13.07              |                   | *                 | LCK            |
| 204891_s_at  | T-ALL                  | 24.00              | *                 | *                 | LCK            |
| 205067_at    | Hyperdiploid           | 3.90               | *                 |                   | IL1B           |
| 205821_at    | MLL-rearranged         | 3.37               | *                 |                   | KLRK1          |
| 206001_at    | T-ALL                  | 0.03               | *                 |                   | NPY            |
| 206231_at    | ETV6-RUNX1             | 11.92              | *                 | *                 | KCNN1          |
| 208894_at    | MLL-rearranged         | 0.54               |                   | *                 | HLA-DRA        |
| 209695_at    | ETV6-RUNX1             | 3.70               | *                 |                   | PTP4A3         |
| 209905_at    | MLL-rearranged         | 194.60             | *                 |                   | HOXA9          |
| 210982_s_at  | MLL-rearranged         | 0.53               |                   | *                 | HLA-DRA        |
| 211796_s_at  | T-ALL                  | 48.81              |                   | *                 | TRBV /// TRBC1 |
| 213317_at    | ETV6-RUNX1             | 50.34              | *                 | *                 | CLIC5          |
| 213423_x_at  | ETV6-RUNX1             | 12.90              |                   | *                 | TUSC3          |
| 213539_at    | T-ALL                  | 90.03              | *                 | *                 | CD3D           |
| 218499_at    | Hyperdiploid           | 1.92               |                   | *                 | MASK           |
| 219686_at    | T-ALL & MLL-rearranged | 0.03 / 0.07        |                   | *                 | STK32B         |
| 220451_s_at  | ETV6-RUNX1             | 4.88               |                   | *                 | BIRC7          |
| 221747_at    | ETV6-RUNX1             | 4.11               |                   | *                 | TNS1           |
| 221748_s_at  | ETV6-RUNX1             | 7.23               |                   | *                 | TNS1           |
| 35974_at     | TCF3(E2A)-rearranged   | 7.66               |                   | *                 | LRMP           |
| 37986_at     | ETV6-RUNX1             | 7.38               |                   | *                 | EPOR           |
| 39318_at     | T-ALL                  | 0.03               |                   | *                 | TCL1A          |

<sup>1</sup> Ratio indicates the ratio in expression level of the indicated gene probe set between the subtype for which the probe set was found discriminative (listed in column with heading 'Group') and the remaining subtypes. T-ALL cases are compared to precursor B-ALL cases and within precursor B-ALL each subtype is compared with the remaining subtypes (e.g. *ETV6-RUNX1*-positive versus *ETV6-RUNX1*-negative precursor B-ALL). *ETV6-RUNX1*, *ETV6-RUNX1 (TEL-AML1)*-positive; Hyperdiploid, >50 chromosomes or DNA-index  $\geq 1.16$ ; *BCR-ABL1*, *BCR-ABL1* positive.

<sup>2</sup> The asterix indicates overlapping probe sets out of the list of 110 probe sets found in the current study and those reported by Yeoh EJ et al. (*Cancer Cell* 2002;1:133-43) and Ross ME et al. (*Blood* 2003;102:2951-9).

Table 5: The predictive value of the gene expression signature to classify 107 DCOG pediatric ALL patients

|                   |                               | True subtype of DCOG cases |                             |              |                               |                           |                        |         |
|-------------------|-------------------------------|----------------------------|-----------------------------|--------------|-------------------------------|---------------------------|------------------------|---------|
|                   |                               | T-ALL                      | <i>ETV6-RUNXI</i> -positive | Hyperdiploid | <i>TCF3 (E2A)</i> -rearranged | <i>BCR-ABL1</i> -positive | <i>MLL</i> -rearranged | B-other |
| Predicted subtype | T-ALL                         | 15                         | 0                           | 0            | 0                             | 0                         | 0                      | 0       |
|                   | <i>ETV6-RUNXI</i> -positive   | 0                          | 24                          | 0            | 0                             | 0                         | 0                      | 2       |
|                   | Hyperdiploid                  | 0                          | 0                           | 28           | 0                             | 0                         | 0                      | 5       |
|                   | <i>TCF3 (E2A)</i> -rearranged | 0                          | 0                           | 0            | 2                             | 0                         | 0                      | 1       |
|                   | <i>BCR-ABL1</i> -positive     | 0                          | 0                           | 0            | 0                             | 0                         | 0                      | 0       |
|                   | <i>MLL</i> -rearranged        | 0                          | 0                           | 0            | 0                             | 0                         | 0                      | 0       |
|                   | B-other                       | 0                          | 0                           | 0            | 0                             | 1                         | 4                      | 25      |

Correctly predicted cases in blue.

**Table 6: Overview of misclassified B-other patients in DCOG validation cohort**

| Patient | Predicted                    | True karyotype*                                                                                                                                                                                                        | Follow up     |
|---------|------------------------------|------------------------------------------------------------------------------------------------------------------------------------------------------------------------------------------------------------------------|---------------|
| #1      | <i>ETV6-RUNX1</i>            | 46,XY, <b>del(12)(p12)</b>                                                                                                                                                                                             | CCR (10.7 yr) |
| #2      | <i>ETV6-RUNX1</i>            | 47,XX,der(7)t(7;12)(p1?2;q1?3),+10, <b>add(12)(p1?1)</b> ,add(12)(q1?1),der(17)t(12;17)(?:q22)[19]/46,XX[12]                                                                                                           | CCR (9.2 yr)  |
| #3      | Hyperdiploid                 | unknown; retrospective FISH revealed -X(14% of cells) and + <b>18</b> (48% of cells)**                                                                                                                                 | REL (0.4yr)   |
| #4      | Hyperdiploid                 | 46,X,-X,der(1)(q12),der(7)(p11),+mar [2]                                                                                                                                                                               | REL (2.3 yr)  |
| #5      | Hyperdiploid                 | unknown, DNA index <b>1.14</b> **                                                                                                                                                                                      | CCR (9.6 yr)  |
| #6      | Hyperdiploid                 | 46,XX,r(7),del(8)(p21p23)[17]/45,sl,-7,-r(7)[6]/45,sl,-19[5]/45,sl,add(4)(q23),-7,-r(7)[3]/45,sl,-7,-r(7),-19[2]/46,XX[1]                                                                                              | CCR (9.8 yr)  |
| #7      | Hyperdiploid                 | 48,XY,+X,t(8;14)(q12;q32),+ <b>21c</b> [13]/47,XY,+ <b>21c</b> [13]                                                                                                                                                    | CCR (13.1 yr) |
| #8      | <i>TCF3(E2A)</i> -rearranged | 47,XX,+?i(X)(q10),der(11)t(1;11)(q12;q14),der(16)?add(16)(p?)?del(16)(q?) [2]/47,sl,+der(?)t(?)X(?)q13[12]<br>/47,sd1,-X,?del(X)(q?) [2]/46,XX[2]<br>retrospective FISH revealed <b>del(19)(p13)</b> in 21% of cells** | REL (4.0 yr)  |

\*in bold:

genetic abnormality that may explain the predicted subtype

\*\*additional information obtained after gene expression profiling

The majority of misclassified B-other cases could be ‘justified’ by the presence of additional genetic abnormalities. E.g. in the DCOG validation cohort 8 B-other cases were misclassified: one hyperdiploid-predicted case turned out to be a Down syndrome patient constitutionally having an additional copy of chromosome 21, another hyperdiploid-predicted case had a DNA-index of 1.14 indicating that this patient is near-hyperdiploid and a third predicted hyperdiploid case turned out to have an extra copy of chromosome 18 in half of the cells (more retrospectively obtained information is lacking due to limited material). Two *ETV6-RUNX1* (*TEL-AML1*)-predicted cases turned out to have a (partial) deletion or duplication of chromosome 12p affecting a.o. the *ETV6* (*TEL*)-locus. Additional (post-profiling) FISH analysis of the predicted *TCF3* (*E2A*)-rearranged case indicated that this case had a 19p13 deletion (affecting the *TCF3* (*E2A*)-locus) in a subset of the leukemic cells. This patient was officially diagnosed as B-other based on available karyotypic data whereas this patient would have been assigned to the *TCF3* (*E2A*)-rearranged subtype if cytogenetic analysis by FISH had been performed in the diagnostic procedure (see also Figure 2B of Den Boer ML et al., Lancet Oncology 2009). The two remaining hyperdiploid-predicted cases had a complex karyotype including both numerical and structural abnormalities or karyotype was not assessed.



**Table 7: Overview of genomic lesions in *BCR-ABL1*-like cases**

| Patient# | IKZF1 <sup>1</sup><br>(IKAROS) | TCF3 <sup>1</sup><br>(E2A) | EBF1 <sup>1</sup> | PAX5 <sup>1</sup> | VPREB1 <sup>1</sup> | Other (molecular) cytogenetic data <sup>2</sup>                                                                           |
|----------|--------------------------------|----------------------------|-------------------|-------------------|---------------------|---------------------------------------------------------------------------------------------------------------------------|
| 1        |                                |                            |                   |                   |                     | 46,XY[20]                                                                                                                 |
| 2        | focal                          |                            | focal             |                   |                     |                                                                                                                           |
| 3        |                                |                            |                   | deleted           |                     | 46,XY,del(9)(p21p23)[29]                                                                                                  |
| 4        | deleted                        |                            |                   | deleted           |                     | 45,XY,t(7;9)(p15;p22),t(3;12;10;6;9)(q21;q24;q22;q15;q21)                                                                 |
| 5        |                                |                            |                   | deleted           |                     | 45,XY,dic(9;20)(p13;q11)                                                                                                  |
| 6        | deleted                        |                            |                   |                   |                     | 46,XX,r(7),del(8)(p21p23)[17]/45,sl,-7,-r(7)[6]/45,sl,-19[5]/45,sl,add(4)(q23),-7,-r(7)[3]/45,sl,-7,-r(7),-19[2]/46,XX[1] |
| 7        | deleted                        |                            |                   | deleted           |                     | 46,XX,dic(9;20)(p11;q11),+21                                                                                              |
| 8        |                                |                            |                   | focal             | deleted             |                                                                                                                           |
| 9        |                                |                            | deleted           |                   |                     |                                                                                                                           |
| 10       | focal                          |                            |                   |                   |                     |                                                                                                                           |
| 11       |                                |                            |                   |                   |                     | 46,XX,t(10;13)(q24;q14)[12]                                                                                               |
| 12       |                                |                            | focal             |                   |                     |                                                                                                                           |
| 13       | focal                          |                            | focal             | focal             | deleted             |                                                                                                                           |
| 14       | focal                          |                            |                   |                   | deleted             |                                                                                                                           |
| 15       | deleted                        |                            |                   |                   |                     | arr cgh 21q22(AML1)x3 (chr21:30.8-40.4 Mb): iAMP21                                                                        |
| 16       |                                |                            |                   |                   |                     | arr cgh 21q22(AML1)x3 (chr21:23.2-44.0 Mb): iAMP21                                                                        |
| 17       |                                |                            | focal             |                   | focal               |                                                                                                                           |
| 18       | focal                          |                            |                   |                   | focal               |                                                                                                                           |
| 19       |                                |                            |                   |                   |                     | arr cgh 21q22(AML1)x3 (chr21:24.1-43.1 Mb): iAMP21                                                                        |
| 20       | focal                          |                            | focal             |                   | focal               |                                                                                                                           |
| 21       | deleted                        |                            |                   | deleted           |                     | dic(9;20)(p13;q11)                                                                                                        |
| 22       |                                |                            |                   | deleted           |                     |                                                                                                                           |
| 23       |                                |                            |                   | deleted           |                     |                                                                                                                           |
| 24       |                                |                            |                   | deleted           |                     | 46,XY,dup(4)(p?p?),t(8;20)(p2:?),del(9)(p11),inv(12)(q21q24),del(20)(p1?2) or del(20)(q1?2)                               |
| 25       | focal                          |                            |                   | focal             |                     |                                                                                                                           |
| 26       |                                |                            |                   | deleted           |                     |                                                                                                                           |
| 27       | focal                          |                            |                   | deleted           | focal               | dic(9;20)(p13;q11)                                                                                                        |
| 28       |                                |                            |                   |                   | focal               |                                                                                                                           |
| 29       | focal                          |                            |                   | deleted           |                     | dic(9;20)(p13;q11)                                                                                                        |
| 30       |                                |                            |                   |                   |                     |                                                                                                                           |
| 31       |                                |                            |                   | focal             |                     | 46,XX,der(8)(?p),t(9;12)(p12;q14),der(10)(?p),del(11)(q22q25)[12]                                                         |
| 32       |                                |                            |                   |                   | deleted             |                                                                                                                           |
| 33       |                                |                            |                   |                   | deleted             |                                                                                                                           |
| 34       |                                |                            |                   |                   | deleted             |                                                                                                                           |
| 35       |                                |                            |                   |                   | deleted             |                                                                                                                           |
| 36       |                                |                            |                   |                   |                     |                                                                                                                           |
| 37       |                                |                            |                   |                   |                     |                                                                                                                           |
| 38       |                                | deleted                    |                   | focal             | deleted             |                                                                                                                           |
| 39       |                                | deleted                    |                   |                   |                     |                                                                                                                           |
| 40       |                                | deleted                    |                   |                   |                     |                                                                                                                           |
| 41       | deleted                        |                            |                   |                   |                     |                                                                                                                           |
| 42       | focal                          |                            |                   |                   | focal               |                                                                                                                           |
| 43       |                                |                            |                   |                   |                     |                                                                                                                           |
| 44       | focal                          |                            |                   |                   | deleted             |                                                                                                                           |

<sup>1</sup> Deleted: deleted area >0.5 Mbp; Focal: deleted area <0.5 Mbp. Blanks: no genetic lesion observed.

<sup>2</sup> Other molecular genetic data comprise information about karyotype and molecular cytogenetics. In addition cases with an intrachromosomal amplification of chromosome 21 (iAMP21) are indicated (data obtained by array-CGH). All cases were negative for *ETV6-RUNX1* (*TEL-AML1*) fusion, hyperdiploidy, *TCF3* (*E2A*)-rearrangement, *MLL*-rearrangement and *BCR-ABL1* fusion.

**Table 8: Breakpoints in chromosome 9(p) and 20(q) are conserved in ALL**

| patient | Break chr 9(p) <sup>1</sup> | Break chr 20(q) <sup>2</sup> | dic(9;20)  |
|---------|-----------------------------|------------------------------|------------|
| 1       | <i>PAX5</i>                 | <i>SPAG4L</i>                | No         |
| 2       | <i>PAX5</i>                 | <i>ASXL1</i>                 | Yes        |
| 3       | <i>PAX5</i>                 | <i>ASXL1</i>                 | Yes        |
| 4       | <i>PAX5</i>                 | <i>DNMT3B</i>                | Yes        |
| 5       | <i>ZCCHC7</i>               | <i>COMMD7</i>                | Not tested |
| 6       | <i>ZCCHC7</i>               | <i>COMMD7</i>                | Yes        |
| 7       | <i>ZCCHC7</i>               | centromere                   | Yes        |
| 8       | 76685                       | centromere                   | Not tested |

<sup>1</sup> *PAX5* and *ZCCHC7* are two adjacent genes on chromosome 9(p13), location: 36,828,531-37,348,145

<sup>2</sup> *ASXL1*, *COMMD7*, *DNMT3B*, *SPAG4L* are adjacent genes on chromosome 20(q11), location: 30,420,479-31,055,900
